# Supplementary material for: The Novel Oral Hsp90 Inhibitor NVP-HSP990 Exhibits Potent and Broad-spectrum Antitumor Activities In Vitro and In Vivo
Source: Oxford University Press journal article supplement (doi:10.1158/1535-7163.mct-11-0667), 2012-01-13

## Supplementary Figure Legends:

**Supplementary Figure 1. *In vitro* mechanistic effects of NVP-HSP990 on p23-Hsp90 complex.** GTL-16 cells were treated with DMSO, 17-AAG (500 nM) or NVP-HSP990 at various concentrations (50, 100, 200 nM) for two hours. The amount of p23 bound to hsp90 was determined by immunoprecipitation/Western blot analysis

**Supplementary Figure 2. PK-PD relationship of various Hsp90 inhibitors *in vivo*.** (A) Correlation of mouse  $t_{1/2, \text{oral}}$  with duration of c-Met PD. Data illustrates PD modulation in hours  $\geq 50\%$  c-Met inhibition relative to vehicle, assessed in the GTL-16 tumor xenograft model in nude mice. (B) Immunohistochemistry of c-Met (a) or Hsp70 (b). GTL-16 tumored nude mice were administered with a single oral treatment of vehicle or NVP-HSP990 (15 mg/kg). Tumors were harvested at 24 h post-dose. Magnification: 200x.

**Supplementary Figure 3. Efficacy of NVP-HSP990 in the GTL-16 (c-Met overexpressing) tumor xenograft model.** (A) Nude mice bearing GTL-16 xenografts were treated orally with vehicle or NVP-HSP990 at various dose/schedules: daily/qd (0.5 mg/kg), twice weekly/q2w (2.5 or 5 mg/kg) or weekly/qw (5, 10, or 15 mg/kg). Tumor inhibition was defined by percent treatment/control (T/C) values as described in Methods. Negative values for tumor inhibition indicate percent tumor regression. \*  $p < 0.05$  versus vehicle (Kruskal-Wallis One Way ANOVA on Ranks; Dunn's); ns, not significant. Data computed from  $n=2$  studies. (B) Quantitation of proliferation index. GTL-16 tumored mice were treated with vehicle or NVP-HSP990 at indicated dose/schedules. Percent Ki67-positive tumor cells were determined by quantitative image analysis of immunohistochemical staining of tumor tissues collected on day 14, 24h post-dose last dose ( $n=3$ ). \*  $p < 0.05$  versus vehicle (One Way ANOVA; Tukey test), ns, not significant

## Supplementary Figure 1

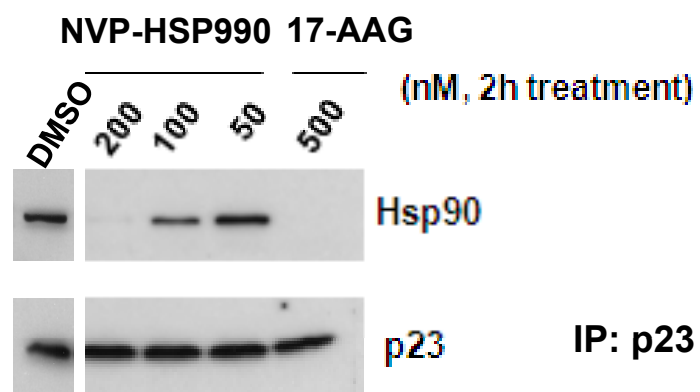

Supplementary Figure 2:

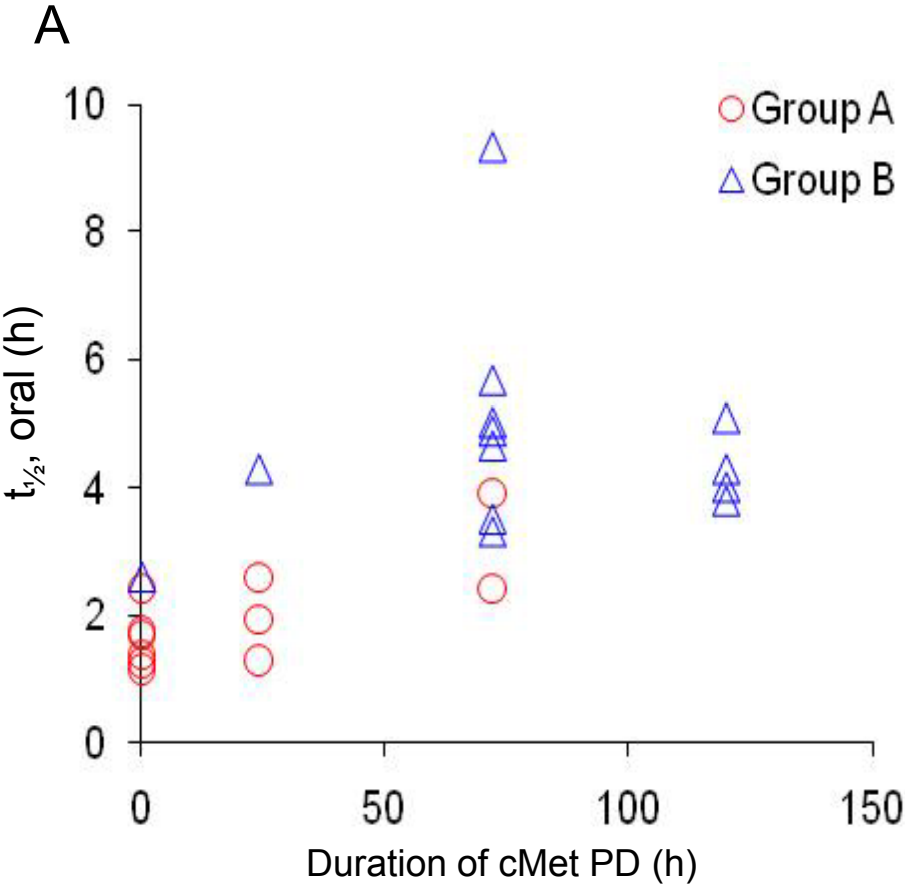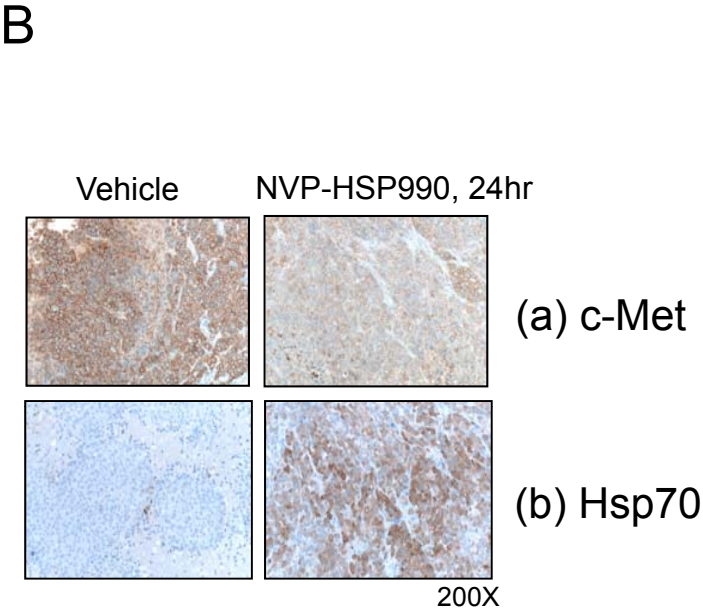

Supplementary Figure 3:

A

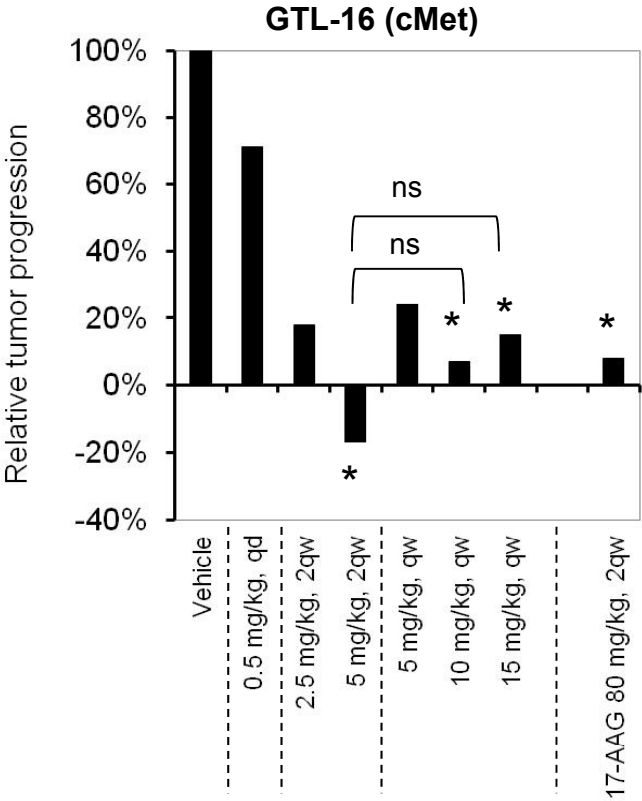

B

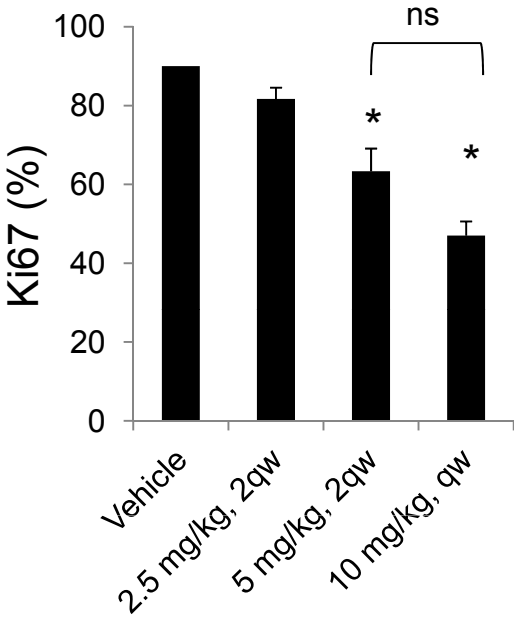

Supplement: 15357163mct110667-sup-f3_pdf_212k.pdf [file 15357163mct110667-sup-f3_pdf_212k.pdf]
